# Supplementary material
Source: Springer Nature journal article supplement (https://www.springermedizin.de/resource/supplementary/12885_2010_2639_MOESM5_ESM.pdf/9461612)

**A**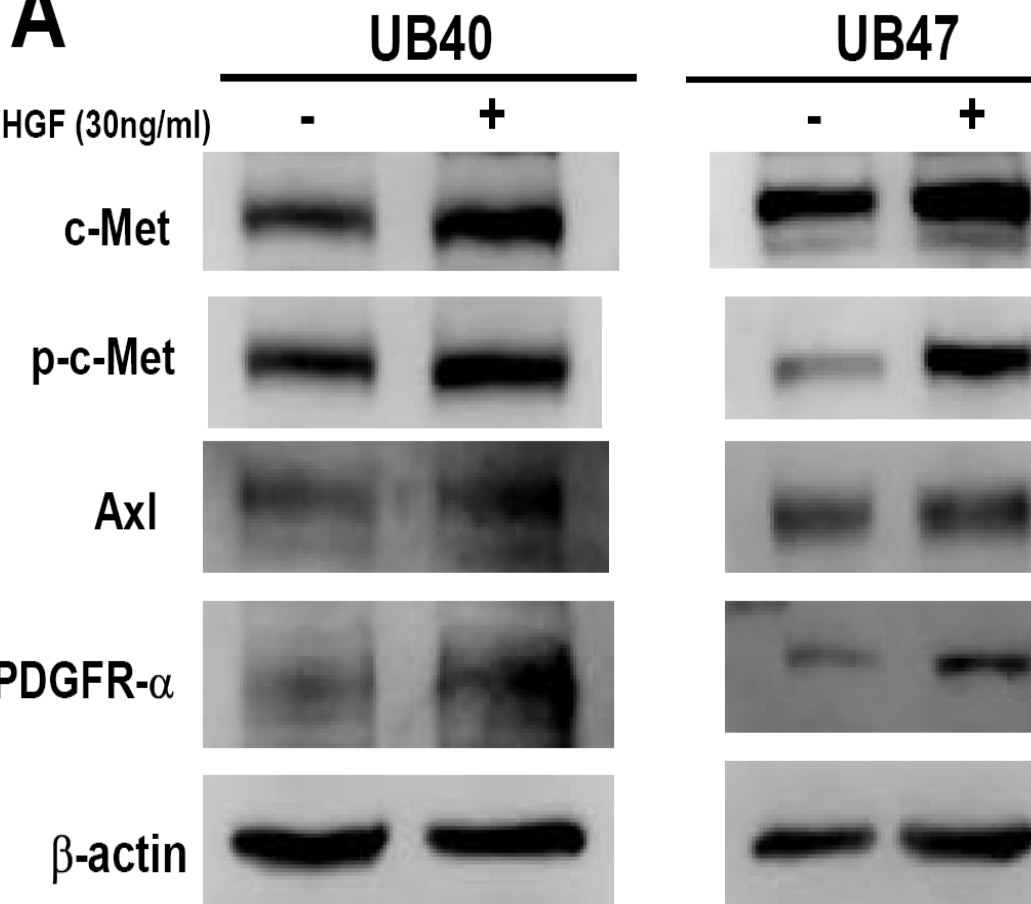**B**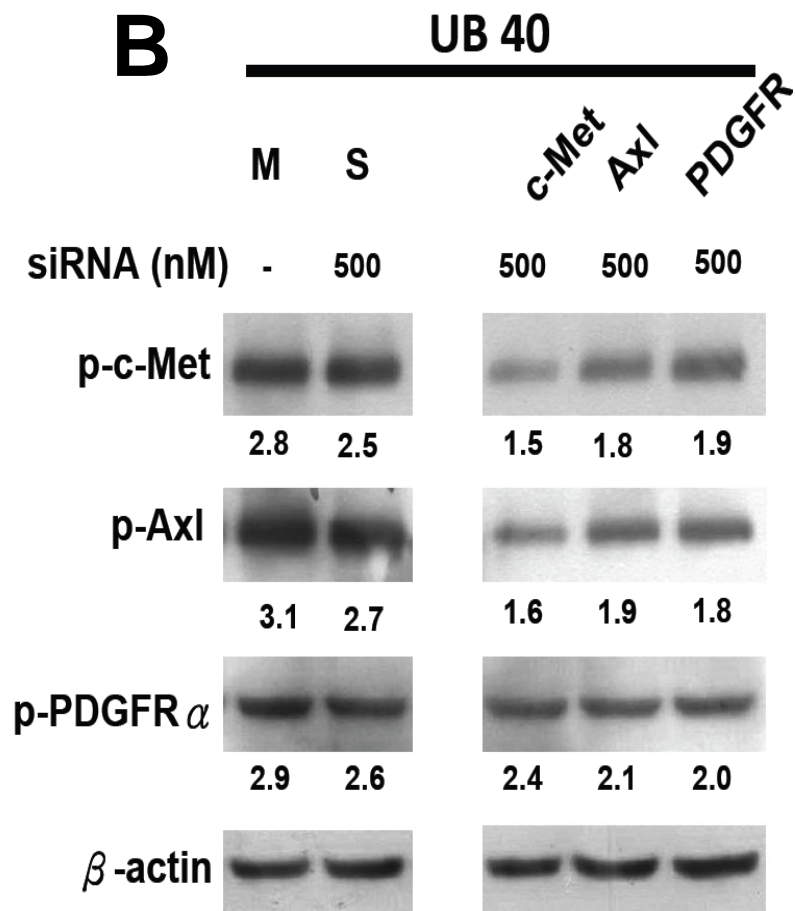

Supplement: MOESM5 [file 9461612]
